# Supplementary material
Source: publisher figshare collection journal article supplement (https://gsapubs.figshare.com/ndownloader/files/22740920)
Supplement: Supplementary file 1 [file 22740920]

**MACFARLANE AND LUZZADDER-BEACH  
DECEMBER 1998 BULLETIN  
DATA REPOSITORY 9875**

**Earth Science Survey**

All data collected in this study will be confidential; all person-identifiable data will be coded so that you cannot be identified. Please fold and staple survey so postage paid side shows, and return by April 15, 1995. Thank you!

1. What is your academic rank?  
 a. Instructor      b. Assistant Professor      c. Associate Professor      d. Professor  
 e. Emeritus/a      f. Other \_\_\_\_\_
  2. a. How many years and months have you been at this rank: \_\_\_\_\_  
 b. Previous rank: \_\_\_\_\_  
 c. Years and months at previous rank: \_\_\_\_\_
  3. Status:      a. Tenure track      b. Tenured      c. Temporary      d. Adjunct  
 e. Visiting      f. Retired
  4. Years in this status? \_\_\_\_\_
  5. University: \_\_\_\_\_
  6. a. Are/were you in a dual career couple status? \_\_\_\_\_  
 b. Is/was your partner an Earth Scientist? \_\_\_\_\_  
 c. Has this had an effect on your career? \_\_\_\_\_  
 d. If so, please elaborate on the effect: \_\_\_\_\_
  7. a. Below is a list of general fields. Please circle the one which best describes your research interests.  
 Geology Geochemistry      Geologic Engineering      Economic Geology      Paleontology  
 Soil Science      Geomorphology      Geophysics      Oceanography      Planetology      Hydrology  
 Meteorology      Atmospheric Dynamics      Other
  - b. Below is a list of specialties in the earth sciences. Circle three categories into which your research best fits.
- |                   |                     |                    |                         |
|-------------------|---------------------|--------------------|-------------------------|
| <b>Geology</b>    | <b>Geochemistry</b> | <b>Geophysics</b>  | <b>Paleontology</b>     |
| Archaeological    | Analytical          | Experimental       | Biostratigraphy         |
| Environmental     | Experimental        | Exploration        | Micropaleontology       |
| Marine            | Exploration         | Geodesy            | Palynology              |
| Crystallography   | Geochronology       | Geomagnetics       | Paleobotany             |
| Mineralogy        | Low Temperature     | Paleomagnetism     | Quantitative            |
| Paleolimnology    | Marine              | Gravity            | Vertebrate              |
| Petroleum         | Organic             | Heat Flow          | Invertebrate            |
| Petrology         | Stable Isotopes     | Seismology         | Paleobiology            |
| Igneous Petrology | Trace Element       | Marine             | Paleoecology            |
| Metamorphic Petr  |                     | Tectonics          | Paleoclimatology        |
| Sedimentary Pet.  | <b>Economic</b>     |                    |                         |
| Sedimentology     | Coal                | <b>Hydrology</b>   | <b>Planetology</b>      |
| Stratigraphy      | Metals              | Ground Water       | Cosmochemistry          |
| Structure         | Nonmetals           | Hydrogeology       | Geology                 |
| Tectonics         | Oil/Gas             | Surface Water      | Geophysics              |
| Volcanology       |                     | Quantitative       | Meteorites/Small Bodies |
| Mineral Physics   | <b>Soil Science</b> | Geomorphology      | Fluid Planets           |
| Historical        | Soil Physics        |                    |                         |
|                   | Soil Chemistry      | <b>Engineering</b> | <b>Oceanography</b>     |
| <b>Other</b>      | Pedology            | Earthquake         | Biological              |
| Atmospheric       | Forests/Wetlands    | Mining Technology  | Chemical                |
| Education         | Soil Biology        | Petroleum          | Geological              |
| Ocean Engineering | Paleopedology       | Rock Mechanics     | Physical                |
| Remote Sensing    |                     |                    | Shore/Nearshore         |
| Meteorology       | Material Science    | Land Use/Planning  |                         |
| Geomorphology     | Glacial Processes   | Astrophysics       | Public Issues           |
| Policy Sciences   | Electromagnetics    |                    |                         |

7. c. Is there a descriptor or key word that would better characterize your research that is not listed above? \_\_\_\_\_

8. No matter which category you selected in No. 9, do you consider your work to be environmental? \_\_\_\_\_

9. Why/how did you choose your field of study? (Circle all that apply.)

- a. Mentor      b. Job experience      c. Interest in nature      d. Interest in scientific method  
 e. Practical applications      f. Theoretical applications      g. Interdisciplinary nature of work  
 h. Option to specialize      i. Dynamic instructor      j. Actively encouraged by teacher      k. Lifelong interest  
 l. Other (explain): \_\_\_\_\_

10. Is your chosen field as interesting to you as when you began your Ph.D. research? \_\_\_\_\_ Why or why not?

11. Have you changed fields since your Ph.D. research? \_\_\_\_\_ If so, why?

12. What are your frustrations with research in your field of study? (Rank those that apply, with 1 most important, 2 less important, etc.)

- a. Competition for funding      b. Competitive nature of research      c. Publishing review process  
 d. Lack of practical applications of research      e. Lack of appropriate journals for your specialty  
 f. Lack of respect from colleagues      g. Lack of communication/interaction with peers  
 h. Lack of networking      i. Tenure process      j. Lack of time for research  
 k. Other (explain): \_\_\_\_\_

13. Does your research address applied ('practical') or theoretical problems? Divide by percent.

- a. Applied \_\_\_\_\_ %  
 b. Theoretical \_\_\_\_\_ %

14. Divide your research (adds up to 100%) between the following:

- a. Field work \_\_\_\_\_  
 b. Quantitative methods/modeling \_\_\_\_\_  
 c. Laboratory analysis \_\_\_\_\_  
 d. Other methods (Identify?) \_\_\_\_\_

15. In which Journals have you published?

16. In which journals have you found it most difficult or impossible to publish?

17. In what other outlets have you published beside journals, e.g., books, chapters, monographs, gov't. reports, private consulting firm reports...?

18. Ph.D. granting institution and department: \_\_\_\_\_

19. a. What was/is your Ph.D. advisor's sex? F \_\_\_\_\_ M \_\_\_\_\_  
 b. In what year did you complete your Ph.D.? \_\_\_\_\_  
 c. Number of years for completion of Ph.D., after MA/MS? \_\_\_\_\_  
 d. What was/is your MA/MS advisor's sex? F \_\_\_\_\_ M \_\_\_\_\_  
 e. In what year did you complete your MA/MS? \_\_\_\_\_  
 f. At your graduate institution, were there any women faculty available as mentors/advisors? \_\_\_\_\_

20. What repertoire of courses do you currently teach? Indicate whether these courses are: needed/assigned by your department (D), or courses you consider to be your choice (C) and mark them undergraduate (U) or graduate (G).

21. Of these courses, which do you enjoy teaching the most?
22. If you had/have the freedom to choose to teach only two courses you most want to, what would their titles be?
23. What associations (formal or informal) do you interact with? (Circle the ones that apply and mark them as (1) Helpful with networking or (0) Unhelpful with networking.
- a. Geological Society of America (GSA)
  - b. American Geophysical Union (AGU)
  - c. Association of Women Geoscientists (AWG)
  - d. Association of Women in Science (AWIS)
  - e. Association of Academic University Professors (AAUP)
  - f. American Association of University Women (AAUW)
  - g. Mineralogical Society of America (MSA)
  - h. Local Geological Society
  - i. Others: List below. \_\_\_\_\_

24. Other Comments:
